# Supplementary material
Source: PubMed Central journal article supplement (PMC8097632)
Supplement: mmc1.pdf [file mmc1.pdf]

## PROPHETIC

### Prospective Identification of Pneumonia in Hospitalized Patients in the ICU

*Stephen P. Bergin, MD; Adrian Coles, PhD; Sara B. Calvert, PharmD; John Farley, MD; John H. Powers, MD; Marcus J. Zervos, MD; Matthew Sims, MD, PhD; Marin H. Kollef, MD; Michael J. Durkin, MD; Badih A. Kabchi, MD; Helen K. Donnelly, RN; Ana Cecilia Bardossy, MD; Claire Greenshields, RN; Daniel Rubin, PhD; Jie-Lena Sun, MS; Karen Chiswell, PhD; Jonas Santiago, PharmD; Peidi Gu, MD; Pamela Tenaerts, MD; Vance G. Fowler Jr. MD; and Thomas L. Holland, MD*

CHEST 2020; 158(6):2370-2380

*Online supplements are not copyedited prior to posting and the author(s) take full responsibility for the accuracy of all data.*

## e-Appendix 1.

### **PROPHETIC Study: United States Principal Investigators and Clinical Trials Transformation Initiative Project Team**

In addition to the authors, the following individuals contributed to the PROPHETIC Study:

United States Principal Investigators:

**Henry Ford Hospital:** Marcus Zervos, MD, **Washington University School of Medicine:** Michael Durkin, MD, **William Beaumont Hospital:** Matthew Sims, MD, PhD, **East Carolina University:** Badih Kabchi, MD, **Ochsner Medical Center:** Julia Garcia-Diaz, MD, **Northwestern:** Richard Wunderink, MD, **University of Cincinnati:** Jay Johannigman, MD, **Duke University:** Christopher Cox, MD, **Vanderbilt University:** Todd Rice, MD, **University of Pittsburgh:** Fernanda Silveira, MD, **University of Louisville:** Mohamed Saad, MD, **University of Alabama:** Todd McCarty, MD, **Steward Saint Elizabeth's Medical Center of Boston:** Jorge Fleisher, MD, **Case Western Reserve University Metro Health Medical Center:** Charles Bark, MD, **University of Pennsylvania:** Ebbing Lautenbach, MD, **UNC:** David van Duin, MD, PhD, **Medical University of South Carolina:** Dannah Wray, MD, **University of Illinois Chicago:** Susan Bleasdale, MD, **Denver Health Medical Center:** Ivor Douglas, MD, **University of Rochester:** Paritosh Prasad, MD, **Lahey Mercy Hospital:** Donald Craven, MD, **Akron General Medical Center:** Richard Watkins, MD, **Anne Arundel Medical Center:** James Welker, MD, **Drexel University College of Medicine:** Sara Schultz, MD, **Atlanta Institute for Medical Research:** Adam Bressler, MD, **University of Virginia Health System:** Robert Sawyer, MD, **University of California Los Angeles:** Zachary Rubin, MD, **The Ohio State Wexner Medical Center:** Kurt Stevenson, MD, **Rutgers-New Jersey Medical School:** Anne Sutherland, MD, **Temple University Hospital:** Jeffrey Jacobson, MD.

CTTI HABP/VABP Studies Project Team (<https://www.ctti-clinicaltrials.org/projects/habpvabp-studies>):

Elizabeth Alexander, Stephen Bergin, Sara Calvert, Adrian Coles, Deborah Collyar, Amy Corneli, Heather Cross, Carisa DeAnda, Helen Donnelly, Beth Evans, John Farley, Vance Fowler, Karen Fusaro, Peidi Gu, Thomas Holland, Jaqueline Huvane, Kristen Miller, Elizabeth Mocka, Christina Murphy, John Powers, Daniel Rubin, Jonas Santiago, Simone Shurland, Pamela Tenaerts, Joshua Thaden, Rose Tiernan, Owen Townes, Henri van Werkhoven.

## Supplementary Methods

### Study Definitions

#### High-Risk

**Treatment with one or more of the following respiratory modalities for at least 12 hours in any 24-hour period, either currently or within the prior 7 days**

- Invasive mechanical ventilation
- Noninvasive ventilation (bilevel positive airway pressure [BiPAP] or continuous positive airway pressure [CPAP]) for any indication other than obstructive sleep apnea
- Noninvasive ventilation
- High-flow, supplemental oxygen therapy via nasal cannula (systems with air/oxygen blender that deliver precise fraction of inspired oxygen (FiO<sub>2</sub>) level)
- High-flow supplemental oxygen therapy delivering at least 50% FiO<sub>2</sub> via aerosol facemask or tracheostomy collar
- Supplemental oxygen therapy delivered via either partial or non-rebreather face mask

#### Hospital-Acquired or Ventilator-Associated Bacterial Pneumonia

**At least one criterion from each section must be present to meet definition of pneumonia**

##### Radiographic Criteria

- Chest radiograph showing the presence of new or progressive infiltrate(s) suggestive of bacterial pneumonia within 48 hours of all other diagnostic criteria being present

##### Respiratory Signs or Symptoms

- New onset or worsening: cough, dyspnea, tachypnea (respiratory rate  $\geq 25$  breaths per minute for patients  $\geq 18$  years), or expectorated sputum production
- New requirement for invasive mechanical ventilation
- Hypoxemia, defined as any of the following:
  - A partial pressure of oxygen (PaO<sub>2</sub>)  $< 60$  millimeters of mercury measured by arterial blood gas (ABG)
  - A worsening (decrease  $> 10\%$ ) of the PaO<sub>2</sub>/FiO<sub>2</sub> ratio
  - Pulse oximetry reading of  $< 90\%$
  - New supplemental oxygen requirement
  - Greater than 2 liter per minute increase in amount of supplemental oxygen required for patients on chronic supplemental oxygen therapy
  - Need for acute changes, after 2 days stability, in ventilator support system to enhance oxygenation, as determined by worsening oxygenation (ABG or PaO<sub>2</sub>/FiO<sub>2</sub>) or needed changes in the amount of positive end-expiratory pressure
- New onset of suctioned respiratory secretions

##### Systemic Inflammation

- Documented body temperature  $\geq 38$  degrees Celsius or  $\leq 35$  degrees Celsius (core body temperature)
- Leukocytosis, defined as total peripheral white blood cell count  $\geq 10,000$  cells/cubic millimeter
- Leukopenia, defined as total peripheral white blood cell count  $\leq 4,500$  cells/cubic millimeter
- Greater than 15% immature neutrophils (bands) noted on peripheral blood film

##### Timing of Symptom Onset

- Signs/symptoms of pneumonia first noted  $> 48$  hours after hospital admission
- Signs/symptoms of pneumonia first noted  $> 48$  hours after initiation of mechanical ventilation
- Signs/symptoms of pneumonia first noted  $< 7$  days after discharge from an inpatient acute or chronic care facility

**e-Figure 1.** PROPHETIC Study Flowchart.

**Part 1** – demographics, admission, medical problems  
**Part 2** – a. pneumonia diagnosis, b. treatment exposures  
**Part 3** – vitals & physiologic data  
**Abx** – Antibiotic treatment and med allergies  
**Micro** – Cultures, pathogens, and sensitivity data  
**Outcome** – Reason follow-up ended

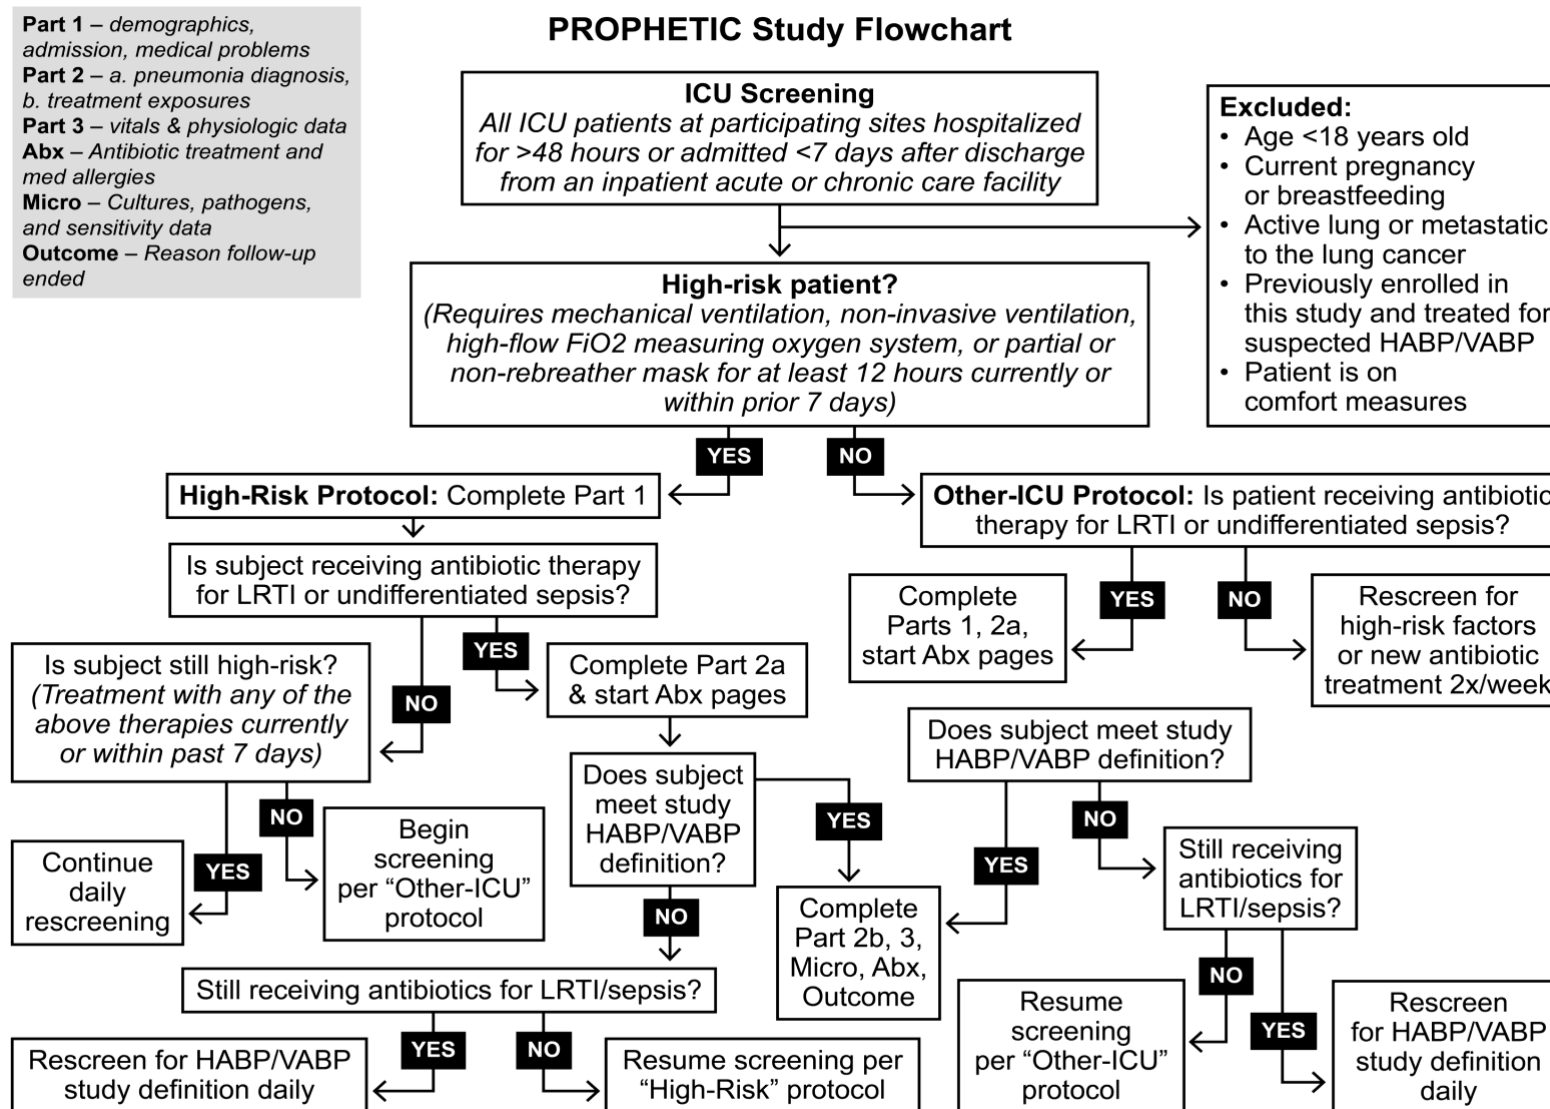

**e-Table 1.** Summary of diagnostic outcome for high-risk patients treated for possible HABP/VABP.

| Diagnostic Outcome                                    | Treated Patients<br>(N=1464) |
|-------------------------------------------------------|------------------------------|
| <b>HABP/VABP Study Definition Fulfilled, N (%)</b>    | 537 (36.7)                   |
| <b>Did Not Meet HABP/VABP Study Definition, N (%)</b> | 927 (63.3)                   |
| Radiographic Criteria                                 | 590 (63.6)                   |
| Respiratory Signs/Symptoms                            | 274 (29.6)                   |
| Systemic Inflammation                                 | 154 (16.6)                   |
| Timing of Symptom Onset                               | 526 (56.7)                   |

Patients not meeting HABP/VABP study definition lacked criteria from at least one diagnostic criteria domain.

**e-Figure 2.** Calibration plot for multivariable hospital-acquired and ventilator-associated pneumonia model.

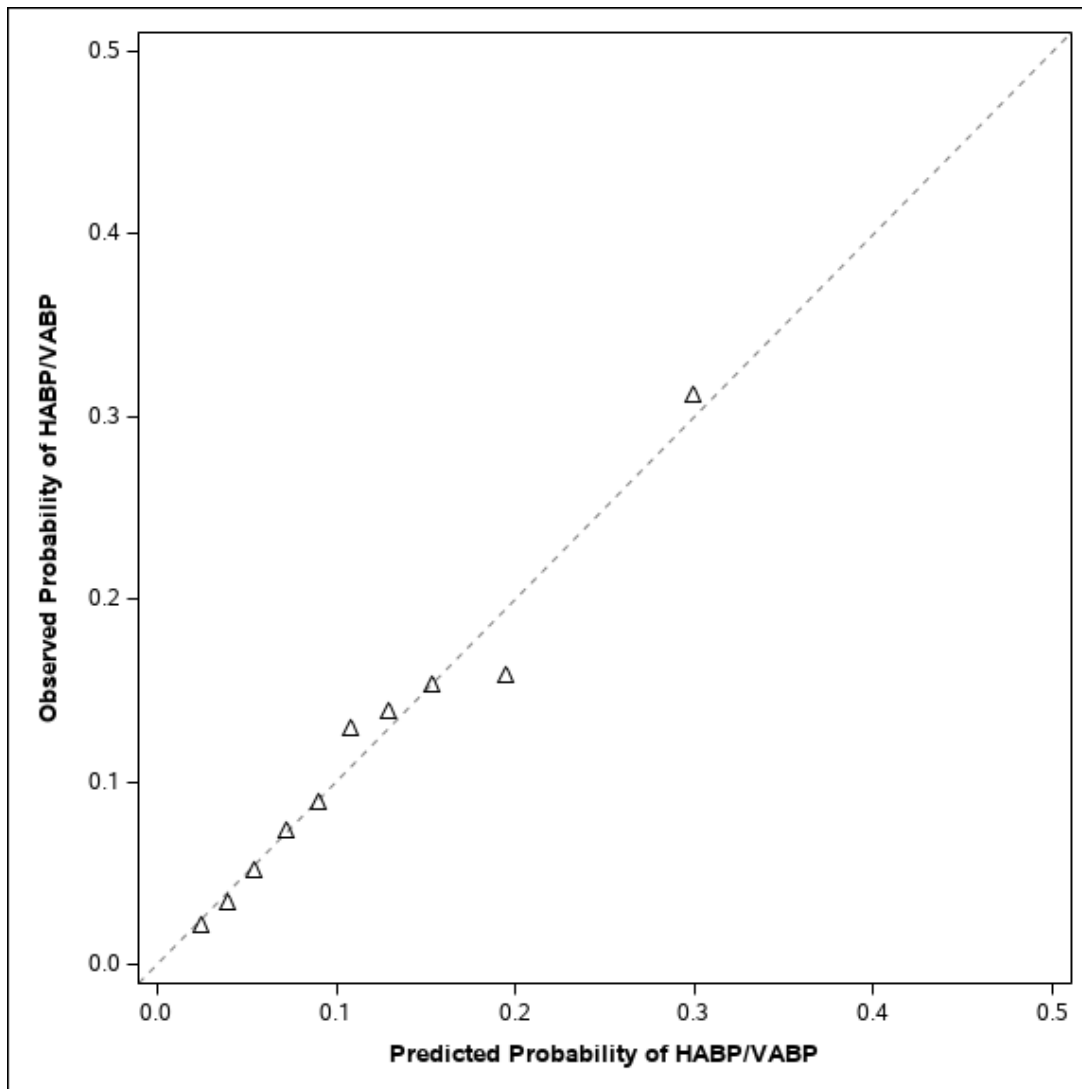

**e-Table 2.** High-Risk Patient Characteristic and Treatment Exposure Associations with Ventilator-Associated Pneumonia Development

| <b>Factor</b>                                    | <b>Type 3<br/>Wald Chi-Square</b> | <b>Beta<br/>Coefficient</b> | <b>Adjusted Odds Ratio<br/>(95% CI)</b> | <b>P-Value</b> |
|--------------------------------------------------|-----------------------------------|-----------------------------|-----------------------------------------|----------------|
| ICU admission diagnosis                          | 57.27                             |                             |                                         |                |
| Acute hypercapnic respiratory failure            |                                   | -0.12                       | 0.89 (0.43, 1.84)                       | 0.755          |
| Acute hypoxemic respiratory failure              |                                   | 0.09                        | 1.09 (0.66, 1.79)                       | 0.733          |
| Acute myocardial infarction                      |                                   | -0.12                       | 0.89 (0.36, 2.19)                       | 0.802          |
| Altered mental status or seizures                |                                   | -0.02                       | 0.98 (0.56, 1.71)                       | 0.939          |
| Cerebrovascular accident                         |                                   | 0.56                        | 1.76 (0.93, 3.31)                       | 0.080          |
| Sepsis or septic shock                           |                                   | -0.19                       | 0.82 (0.45, 1.52)                       | 0.534          |
| Trauma                                           |                                   | 1.36                        | 3.89 (2.26, 6.69)                       | <.001          |
| Shock (excluding septic shock)                   |                                   | 0.19                        | 1.21 (0.67, 2.18)                       | 0.531          |
| Other                                            |                                   | 0.14                        | 1.15 (0.72, 1.83)                       | 0.563          |
| Planned post-operative ICU admission             |                                   |                             | reference                               |                |
| Enteral nutrition                                | 40.99                             | 1.16                        | 3.19 (2.24, 4.56)                       | <.001          |
| Aspiration risk                                  | 34.84                             | 0.80                        | 2.22 (1.70, 2.89)                       | <.001          |
| Admission source                                 | 12.43                             |                             |                                         |                |
| Skilled nursing, long term acute care            |                                   | 0.46                        | 1.58 (0.92, 2.72)                       | 0.094          |
| Non-procedure; clinic or direct admission        |                                   | 0.39                        | 1.47 (1.11, 1.96)                       | 0.008          |
| Scheduled procedure                              |                                   | -0.22                       | 0.80 (0.49, 1.31)                       | 0.381          |
| Other                                            |                                   | 0.29                        | 1.33 (0.92, 1.93)                       | 0.125          |
| Emergency department                             |                                   |                             | reference                               |                |
| Systemic antibacterials within 90 days           | 8.06                              | 0.35                        | 1.42 (1.12, 1.82)                       | 0.005          |
| Blood product transfusion in the last 7 days     | 4.75                              | 0.27                        | 1.31 (1.03, 1.67)                       | 0.029          |
| Proton pump inhibitor therapy/H2-blocker therapy | 2.15                              | 0.22                        | 1.25 (0.93, 1.68)                       | 0.143          |
| Diabetes mellitus                                | 1.46                              | -0.16                       | 0.85 (0.66, 1.10)                       | 0.227          |
| ICU length of stay (days), per 1-day increase    | 1.20                              | 0.01                        | 1.01 (0.99, 1.03)                       | 0.274          |
| Noninvasive mechanical ventilation               | 0.26                              | 0.09                        | 1.10 (0.77, 1.56)                       | 0.612          |
| Female sex                                       | 0.17                              | -0.05                       | 0.95 (0.76, 1.19)                       | 0.682          |
| Corticosteroids at current hospitalization       | 0.10                              | 0.05                        | 1.05 (0.76, 1.46)                       | 0.753          |

Abbreviations: CI = confidence interval; ICU = intensive care unit; OR = odds ratio

Characteristics and treatment exposures recorded at time of high-risk population enrollment.

3712 patients at risk for VABP included in analysis; patients without invasive mechanical ventilation exposure or developing pneumonia <48 hours after starting invasive mechanical ventilation excluded.

Risk factors selected using backward selection with  $\alpha=0.1$  for model inclusion and clinical expertise.

C-statistic: 0.698 (0.671, 0.726)

**e-Figure 3.** Calibration plot for multivariable ventilator-associated pneumonia model

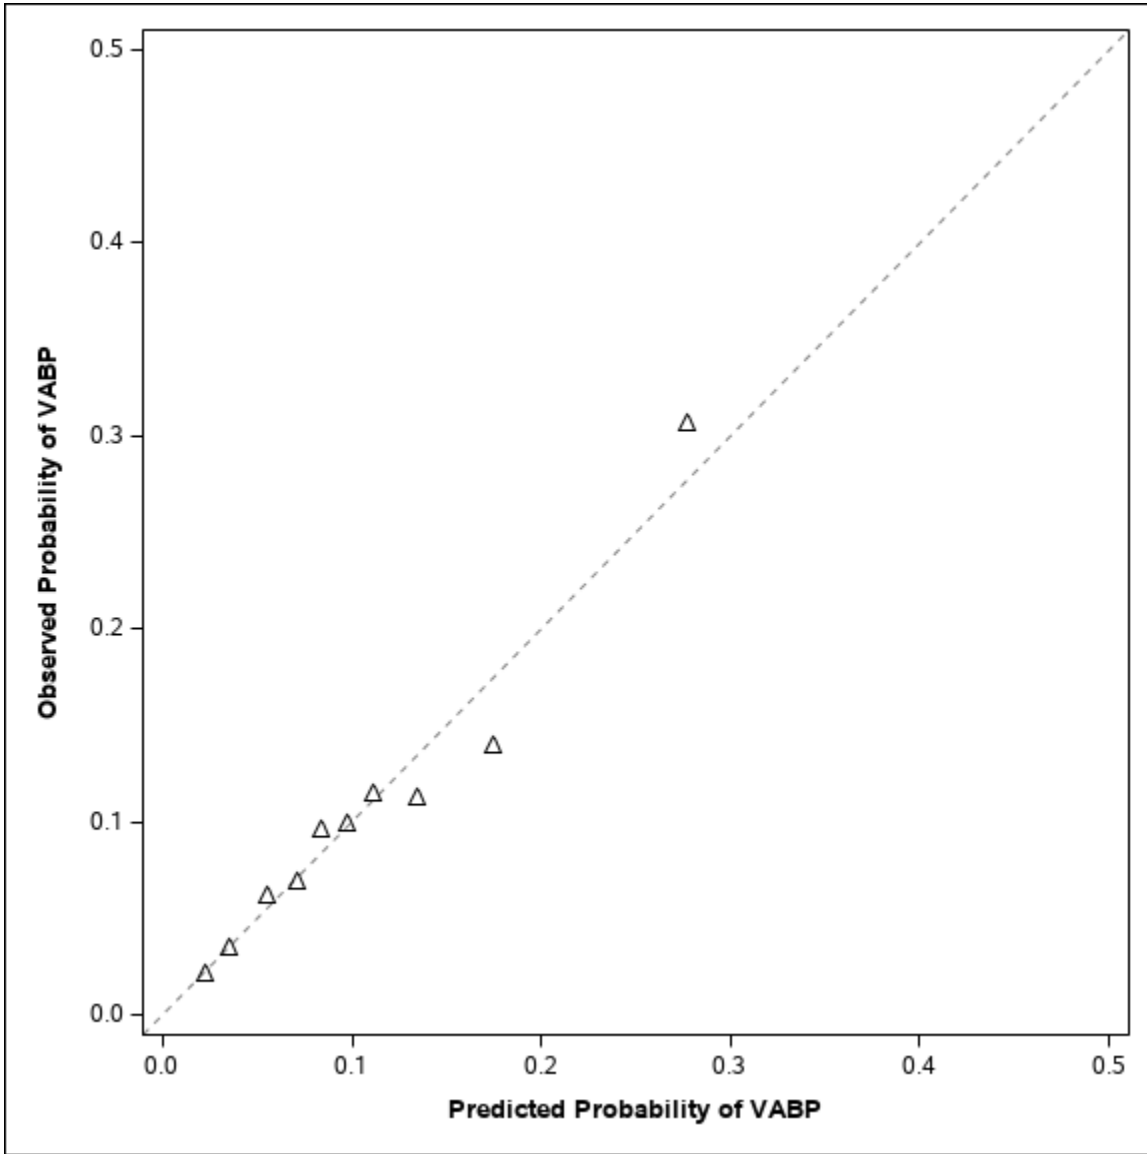

**e-Figure 4.** Microbiologic testing among patients with hospital-acquired bacterial pneumonia

**Microbiologic testing among patients with HABP and ≥ 1 test collected (N=120)**

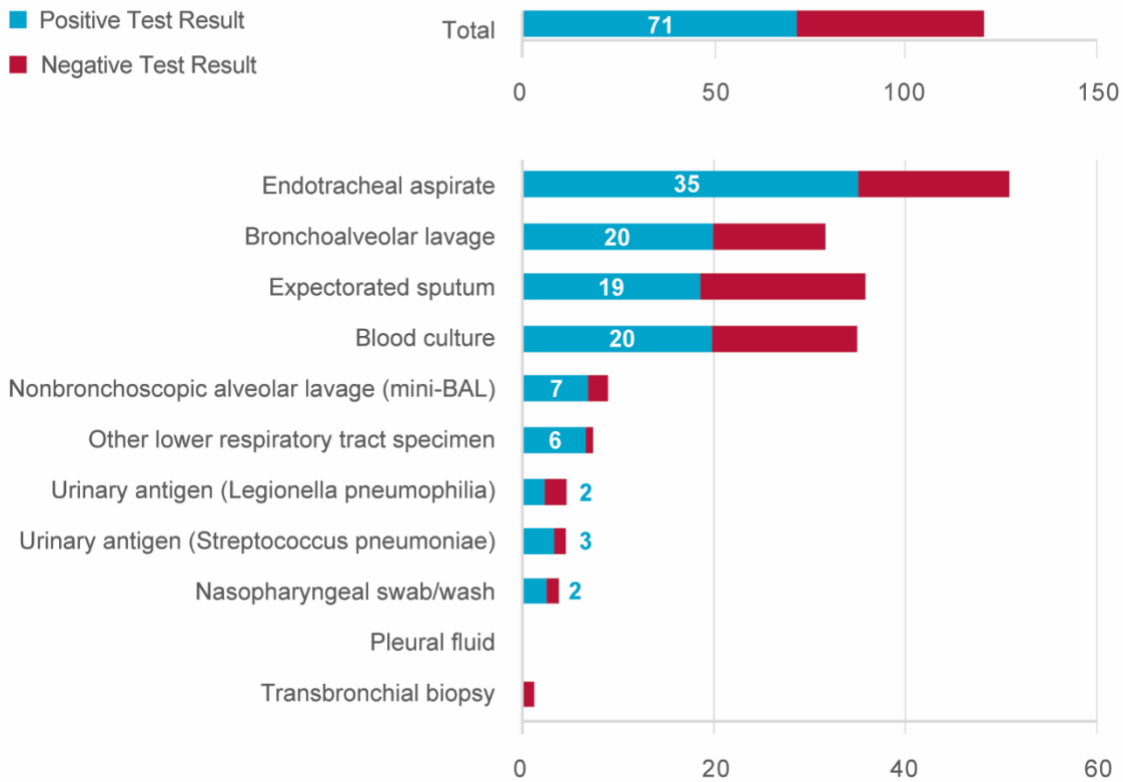

\* Microbiology testing data reported for 120 of 143 (84%) HABP patients

† ≥1 positive microbiologic test was reported in 71 of 120 (59%) HABP patients with microbiology data reported



**e-Figure 5.** Microbiologic testing among patients with ventilator-associated bacterial pneumonia

**Microbiologic testing among patients with VABP and ≥ 1 test collected (N=357)**

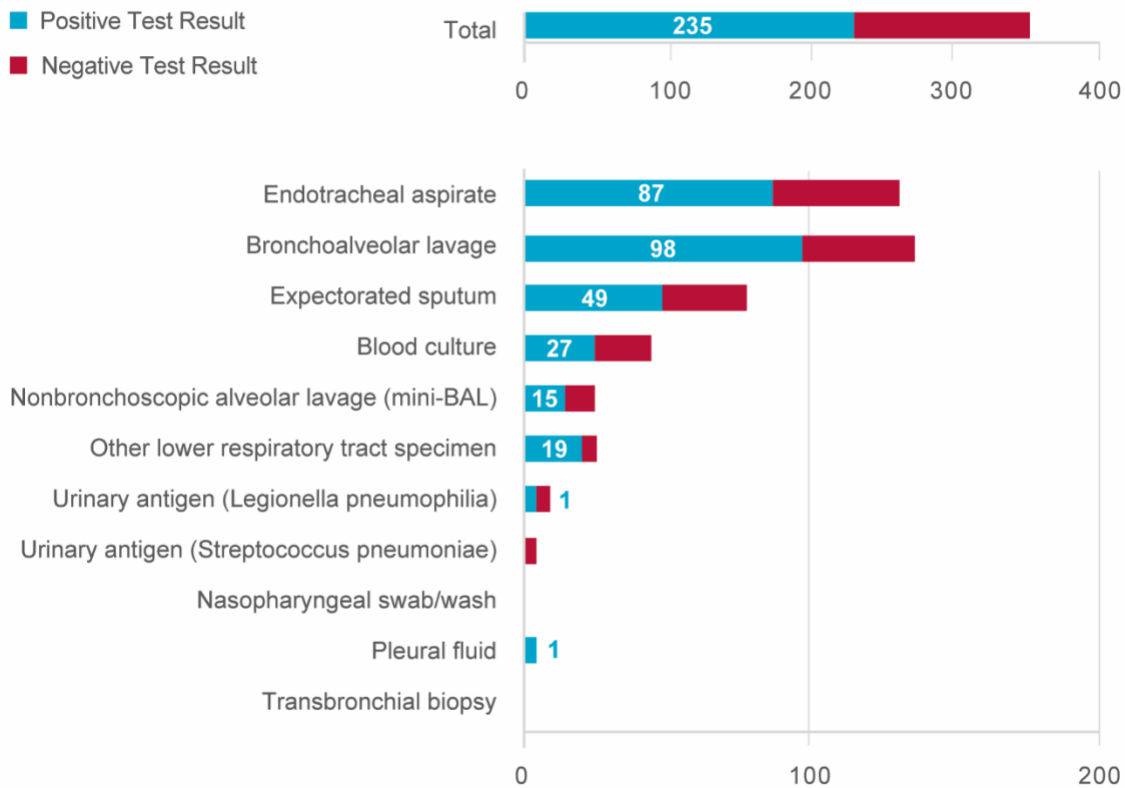

\* Microbiology testing data reported for 357 of 394 (91%) VABP patients

† ≥1 positive microbiologic test was reported in 235 of 357 (66%) VABP patients with microbiology data reported

**e-Figure 6.** Microbiologic testing results among patients with hospital-acquired bacterial pneumonia

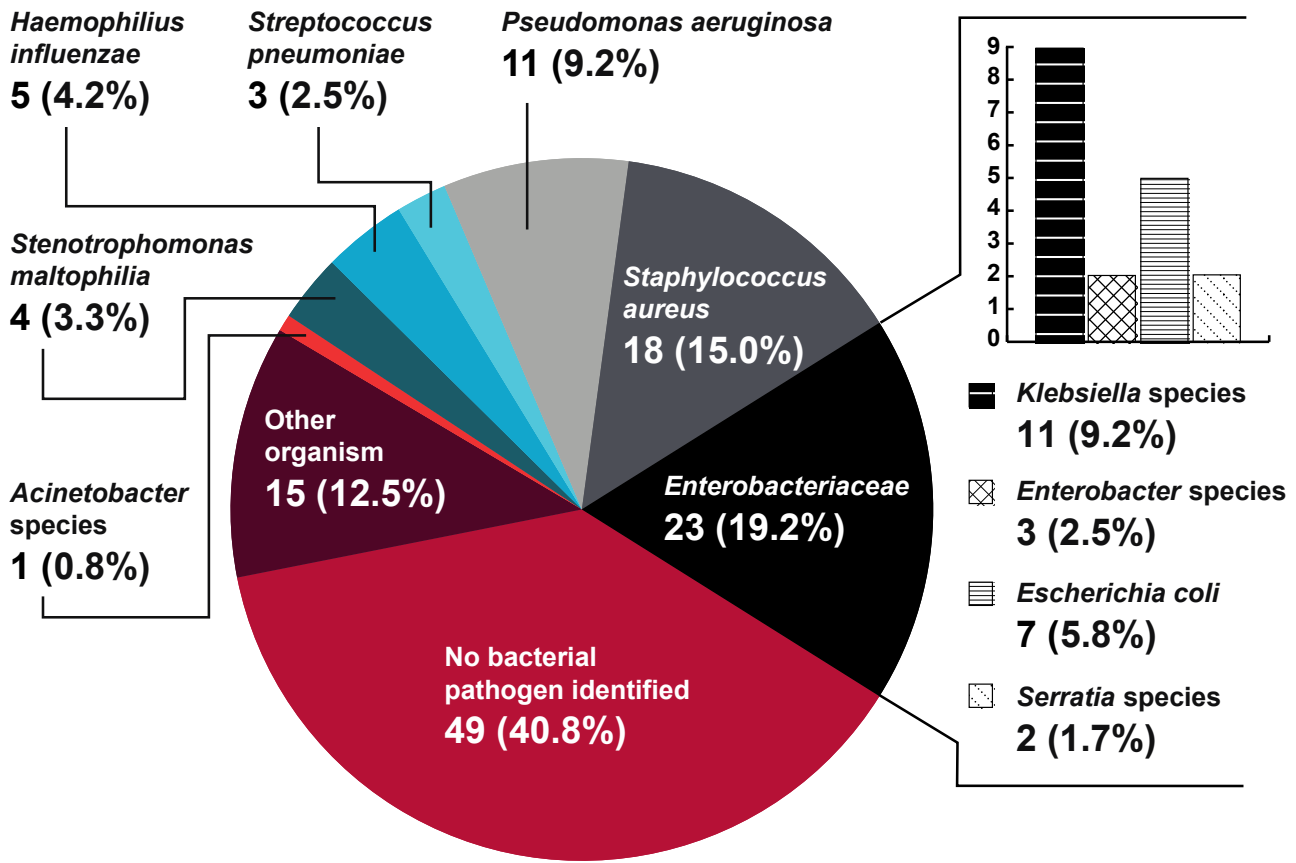

Microbiologic testing for bacteria available for 120 of 143 (84%) HAP patients.

**e-Figure 7.** Microbiologic testing results among patients with ventilator-associated bacterial pneumonia

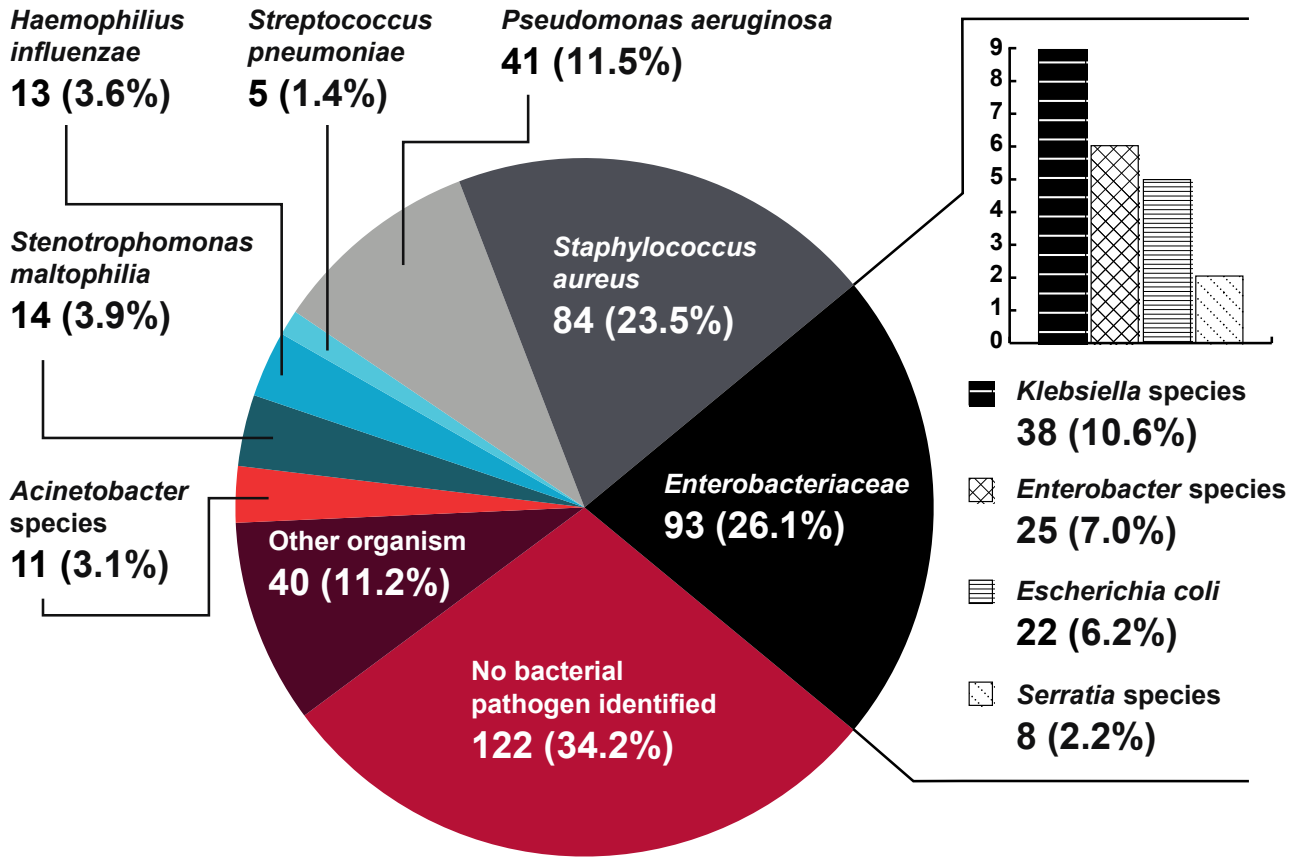

Microbiologic testing for bacteria available for 357 of 394 (91%) VABP patients.

**e-Table 3.** HABP/VABP prevention measures typically utilized at study sites.

| <b>HABP/VABP Prevention Strategy</b>                                | <b>Study Sites<br/>(N=25)</b> |
|---------------------------------------------------------------------|-------------------------------|
| Regular Oral Care with Chlorhexidine                                | 25 (100%)                     |
| Elevate Head of Patient's Bed 30-45 degrees                         | 25 (100%)                     |
| Daily Sedative Interruption                                         | 24 (96%)                      |
| Daily Spontaneous Breathing Trial                                   | 24 (96%)                      |
| Pharmacologic Stress Ulcer Prophylaxis                              | 23 (92%)                      |
| Early Mobility Protocol                                             | 21 (84%)                      |
| Routine Monitoring of Gastric Residual Volume                       | 13 (52%)                      |
| Endotracheal Tube with Subglottic Suctioning                        | 10 (40%)                      |
| Early Tracheostomy (Before Ventilator Day 10)                       | 8 (32%)                       |
| Automated Endotracheal Tube Cuff Pressure Control                   | 5 (20%)                       |
| Prophylactic Antibiotic Treatment of MRSA Colonization              | 3 (12%)                       |
| Prophylactic Antibiotic Treatment of Colonization (other organisms) | 0                             |
| Prophylactic Probiotic Administration                               | 2 (8%)                        |
| Selective Oral Decontamination                                      | 2 (8%)                        |
| Selective Digestive Decontamination                                 | 0                             |
| Silver-Coated Endotracheal Tube                                     | 1 (4%)                        |

25/28 (89%) sites reporting prevention strategies, representing 5647/5725 (99%) of patients enrolled.
